# Supplementary material for: The Clinical Course of Bowel Urgency Severity Among Patients with Inflammatory Bowel Disease—A Real-World Study
Source: PubMed Central journal article supplement — Drugs Real World Outcomes. 2024 Jun 15;11(3):403–12. doi: 10.1007/s40801-024-00434-1 (PMC11365885; doi:10.1007/s40801-024-00434-1), 2024-06-15

## **Supplementary material**

**Journal:** Drugs - Real World Outcomes (DRWO)

**Manuscript Title:** Demographic and Clinical Characteristics of Patients With Crohn's Disease and Ulcerative Colitis Experiencing Changes in Bowel Urgency Severity – A Real-World Study

**Author list:** James D. Lewis<sup>1</sup>, Theresa H. Gible<sup>2</sup>, Mingyang Shan<sup>2</sup>, Xian Zhoa<sup>3</sup>, April N. Naegeli<sup>2</sup>, Ghadeer K. Dawwas<sup>4</sup>

<sup>1</sup> University of Pennsylvania, Philadelphia, USA

<sup>2</sup> Eli Lilly and Company, Indianapolis, USA

<sup>3</sup> Syneos Health, Morrisville, North Carolina, USA

<sup>4</sup> Vanderbilt University Medical Center, Tennessee, USA

## **Corresponding author:**

James D. Lewis, M.D., M.S.C.E.

University of Pennsylvania

Center for Clinical Epidemiology and Biostatistics

7th Floor, Blockley Hall, 423 Guardian Drive

Philadelphia, Pennsylvania 19104-6021, USA

E-mail: lewisjd@pennmedicine.upenn.edu; fax: (215) 573-5325

**Table S1.** List of patient-reported outcomes.

| Questionnaires                                                                                   | Choice of response                                                                                                                                                                                                                                                                   |
|--------------------------------------------------------------------------------------------------|--------------------------------------------------------------------------------------------------------------------------------------------------------------------------------------------------------------------------------------------------------------------------------------|
| During the last week, do you have any of the following symptoms? Check all that apply            | <input type="checkbox"/> Fatigue<br><input type="checkbox"/> Felt depressed or blue                                                                                                                                                                                                  |
| What is your average (typical) number of bowel movements that you had in a single day last week? | <input type="text"/>                                                                                                                                                                                                                                                                 |
| Over the last 3 days, how would you describe the frequency of your stools?                       | <input type="checkbox"/> Normal number of stools<br><input type="checkbox"/> 1–2 stools more than normal<br><input type="checkbox"/> 3–4 stools more than normal<br><input type="checkbox"/> >4 stools more than normal<br><input type="checkbox"/> Not applicable, I have an ostomy |
| Over the last 3 days, how would you describe the consistency of most of your bowel movement      | <input type="checkbox"/> Formed<br><input type="checkbox"/> Soft or semi-formed<br><input type="checkbox"/> Mostly or all liquid                                                                                                                                                     |
| Over the last 3 days, how much rectal bleeding have you experienced?                             | <input type="checkbox"/> No blood seen<br><input type="checkbox"/> Blood less than 50% of the time<br><input type="checkbox"/> Blood 50% or more of the time                                                                                                                         |
| Over the last 3 days, how much abdominal pain have you had?                                      | <input type="checkbox"/> None<br><input type="checkbox"/> Mild<br><input type="checkbox"/> Moderate<br><input type="checkbox"/> Severe                                                                                                                                               |
| Over the last 3 days, how much urgency have you had before bowel movements?                      | <input type="checkbox"/> None. I can wait 15 minutes or longer to have a bowel movement.                                                                                                                                                                                             |

|                                                                                       |                                                                                                                                                                                                                                                                                                                                                                                                                                            |
|---------------------------------------------------------------------------------------|--------------------------------------------------------------------------------------------------------------------------------------------------------------------------------------------------------------------------------------------------------------------------------------------------------------------------------------------------------------------------------------------------------------------------------------------|
|                                                                                       | <input type="checkbox"/> Mild. I need to get to the bathroom within 5–15 minutes.<br><input type="checkbox"/> Moderate. I need to get to the bathroom within 2–5 minutes.<br><input type="checkbox"/> Moderately severe. I need to get to the bathroom in less than 2 minutes.<br><input type="checkbox"/> Severe. Sometimes I am unable to make it to the bathroom in time.<br><input type="checkbox"/> Not applicable. I have an ostomy. |
| <p>During the last months, have you had nighttime bowel movement?</p>                 | <input type="checkbox"/> Yes<br><input type="checkbox"/> No                                                                                                                                                                                                                                                                                                                                                                                |
| <p>During the last month, have you had leakage of your stool while sleeping?</p>      | <input type="checkbox"/> Yes<br><input type="checkbox"/> No                                                                                                                                                                                                                                                                                                                                                                                |
| <p>During the last month, have you had any leakage of stool while you were awake?</p> | <input type="checkbox"/> Yes<br><input type="checkbox"/> No                                                                                                                                                                                                                                                                                                                                                                                |
| <p>Please rate your general well-being over the last 3 days</p>                       | <input type="checkbox"/> Generally well<br><input type="checkbox"/> Slightly under par<br><input type="checkbox"/> Poor<br><input type="checkbox"/> Very poor<br><input type="checkbox"/> Terrible                                                                                                                                                                                                                                         |
| <p>Physician’s global assessment of the current disease status</p>                    | <input type="checkbox"/> Quiescent<br><input type="checkbox"/> Mild<br><input type="checkbox"/> Moderate<br><input type="checkbox"/> Severe                                                                                                                                                                                                                                                                                                |

**Table S2: Patients with and without 6 months urgency data by enrollment urgency data**

|                           | Crohn's Disease                    |                                 |         | Ulcerative Colitis                 |                                 |         |
|---------------------------|------------------------------------|---------------------------------|---------|------------------------------------|---------------------------------|---------|
| Urgency at Baseline       | Missing urgency at 6 months, n (%) | With urgency at 6 months, n (%) | P-value | Missing urgency at 6 months, n (%) | With urgency at 6 months, n (%) | P-value |
| No urgency                | 604 (35%)                          | 282 (34%)                       |         | 324 (36%)                          | 188 (43%)                       |         |
| Mild                      | 547 (31%)                          | 283 (34%)                       |         | 264 (30%)                          | 125 (29%)                       |         |
| Moderate                  | 285 (16%)                          | 162 (20%)                       |         | 129 (15%)                          | 50 (12%)                        |         |
| Moderate severe or severe | 316 (18%)                          | 105 (13%)                       | 0.002   | 174 (20%)                          | 72 (17%)                        | 0.073   |

**Fig. S1: Patient Attrition Flow Chart**

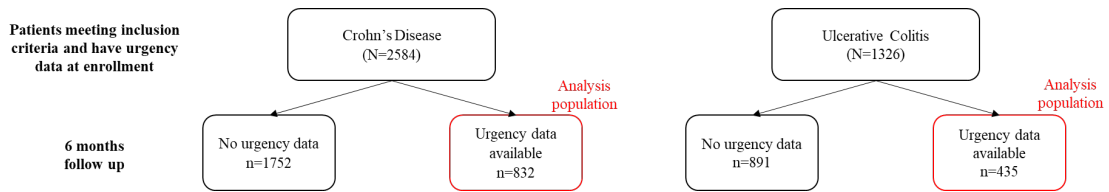

Supplement: 40801_2024_434_MOESM1_ESM.pdf [file 40801_2024_434_MOESM1_ESM.pdf]
